# Supplementary material for: Nutlin-3a: A Potential Therapeutic Opportunity for TP53 Wild-Type Ovarian Carcinomas
Source: PLoS One. 2015 Aug 6;10(8):e0135101. doi: 10.1371/journal.pone.0135101 (PMC4527847; doi:10.1371/journal.pone.0135101)
Supplement: S4 Table — (XLSX) [file pone.0135101.s007.xlsx]

## Sheet: Sheet1
S4_Table. List of up-regulated genes in Nutlin-3a resistant ovarian cancer cell lines in comparison to all sensitive ovarian cancer cell lines with wild-type p53
probe set	gene	Accession	EntrezGene	Description	baseline mean	baseline mean's SE	experiment mean	experiment mean's SE	fold change	lower bound of FC	upper bound of FC	difference of means	t statistic	P value
207852_at	CXCL5: chemokine (C-X-C motif) ligand 5	NM_002994	6374	g4506848	8.74	3.51	1824.58	656.98	208.74	75.44	665.14	1815.84	2.764	0.027938
209875_s_at	SPP1: secreted phosphoprotein 1	M83248	6696	g189150	45.52	14.09	8400.13	3337.43	184.55	60.12	438.16	8354.61	2.503	0.040795
227614_at	HKDC1: hexokinase domain containing 1	W81116	80201	Hs.20524.0	27.23	24.27	1849.67	494.24	67.94	22.95	100000000	1822.44	3.683	0.007763
208650_s_at	CD24: CD24 molecule	BG327863	100133941	Hs.286124.1	96.48	81.48	5268.36	1693.51	54.6	17.16	100000000	5171.88	3.05	0.018468
1563357_at	Hs2.435476.1	AL049245		Hs2.435476.1	10.48	2.86	522.49	208.27	49.86	16.35	108.63	512.02	2.458	0.043565
214974_x_at	CXCL5: chemokine (C-X-C motif) ligand 5	AK026546	6374	Hs.287716.0	79.11	102.3	3513.3	1174.44	44.41	10.83	100000000	3434.19	2.913	0.022189
205767_at	EREG: epiregulin	NM_001432	2069	g4557566	63.7	65.7	1775.26	661.73	27.87	7.03	100000000	1711.56	2.574	0.0362
238021_s_at	CRNDE: colorectal neoplasia differentially expressed (non-protein coding)	AA954994	643911	Hs.237396.1	109.8	80.15	2594.38	754.15	23.63	8.45	100000000	2484.58	3.276	0.013142
222803_at	PRTFDC1: phosphoribosyl transferase domain containing 1	AI871620	56952	Hs.22835.0	38.9	14.72	777.97	270.66	20	7.61	57.66	739.07	2.727	0.029315
235940_at	C9orf64: chromosome 9 open reading frame 64	AW983691	84267	Hs.145809.0	28.04	19.13	514.03	93.19	18.33	7.91	100000000	485.99	5.109	0.001091
221577_x_at	GDF15: growth differentiation factor 15	AF003934	9518	g2290971	315.62	175.21	5699.89	2126.47	18.06	5.78	211.51	5384.26	2.523	0.039179
201302_at	ANXA4: annexin A4	NM_001153	307	g4809272	288.42	102.48	5128.62	1516.13	17.78	7.96	46.05	4840.2	3.185	0.015194
223541_at	HAS3: hyaluronan synthase 3	AF232772	3038	g7110557	43.8	9.82	708.6	234.95	16.18	6.99	30.46	664.81	2.827	0.025421
209723_at	SERPINB9: serpin peptidase inhibitor, clade B (ovalbumin), member 9	BC002538	5272	g12803428	53.95	27.49	852	271.5	15.79	6.07	100.01	798.04	2.924	0.021705
217028_at	CXCR4: chemokine (C-X-C motif) receptor 4	AJ224869	7852	Hs.89414.1	31.72	13.4	488.14	168.48	15.39	5.78	53.75	456.43	2.701	0.030256
218717_s_at	LEPREL1: leprecan-like 1	NM_018192	55214	g8922618	127.94	68.22	1968.58	739.99	15.39	4.93	128.36	1840.64	2.477	0.041851
224209_s_at	GDA: guanine deaminase	AF019638	9615	g6469319	252.22	165.68	3866.93	812.38	15.33	6.52	100000000	3614.71	4.36	0.002758
226066_at	MITF: microphthalmia-associated transcription factor	AL117653	4286	Hs.5884.0	120.76	87.26	1795.18	615.2	14.87	4.76	100000000	1674.42	2.695	0.029766
215034_s_at	TM4SF1: transmembrane 4 L six family member 1	AI189753	4071	Hs.306643.0	398.68	236.38	5851.91	1240.12	14.68	6.52	593.9	5453.23	4.32	0.002968
228171_s_at	PLEKHG4: pleckstrin homology domain containing, family G (with RhoGef domain) member 4	AI056683	25894	Hs.49725.0	39.8	31.72	570.72	221.02	14.34	3.88	100000000	530.92	2.378	0.047682
207233_s_at	MITF: microphthalmia-associated transcription factor	NM_000248	4286	g4557754	91.88	44.99	1253.11	419.8	13.64	5.08	72.56	1161.23	2.75	0.027863
237323_at	HKDC1: hexokinase domain containing 1	AW451101	80201	Hs.159489.0	32.86	13.28	443.43	127.05	13.49	5.99	42.34	410.58	3.214	0.014347
213664_at	SLC1A1: solute carrier family 1 (neuronal/epithelial high affinity glutamate transporter, system Xag), member 1	AW235061	6505	Hs.91139.1	76.53	80.05	1014.59	351.19	13.26	3.55	100000000	938.06	2.604	0.032441
201301_s_at	ANXA4: annexin A4	BC000182	307	g12652858	517.9	276.16	6862.12	1900.17	13.25	5.52	109.33	6344.22	3.304	0.012307
203632_s_at	GPRC5B: G protein-coupled receptor, family C, group 5, member B	NM_016235	51704	g7706450	111.68	23.42	1446.53	456.14	12.95	5.93	23.47	1334.85	2.923	0.022128
242931_at	LONRF3: LON peptidase N-terminal domain and ring finger 3	AI218358	79836	Hs.175048.0	23.79	5.64	293.39	95.16	12.33	5.42	23.68	269.6	2.828	0.025287
203828_s_at	IL32: interleukin 32	NM_004221	9235	g4758811	124.47	65.99	1460.32	387.1	11.73	5.01	92.9	1335.85	3.402	0.010496
203455_s_at	SAT1: spermidine/spermine N1-acetyltransferase 1	NM_002970	6303	g4506788	433.1	243.61	5064.62	1078.02	11.69	5.3	157.09	4631.52	4.191	0.003317
266_s_at	CD24: CD24 molecule	L33930	100133941	L33930	502.01	530.96	5774.52	1708.48	11.5	3.38	100000000	5272.51	2.947	0.017924
212092_at	PEG10: paternally expressed 10	BE858180	23089	Hs.137476.0	260.44	223.69	2988.08	1050.79	11.47	3.33	100000000	2727.64	2.539	0.036168
213397_x_at	RNASE4: ribonuclease, RNase A family, 4	AI761728	6038	Hs.74711.2	17.2	5.04	188.31	70.81	10.95	3.92	24.61	171.11	2.41	0.046404
235740_at	MCTP1: multiple C2 domains, transmembrane 1	BG250585	79772	Hs.151489.0	19.1	6.5	208.94	49.91	10.94	5.61	26.22	189.83	3.771	0.00656
204933_s_at	TNFRSF11B: tumor necrosis factor receptor superfamily, member 11b	NM_002546	4982	g4507566	191.76	101.15	2017.6	691.66	10.52	3.75	81.39	1825.85	2.612	0.033576
203329_at	PTPRM: protein tyrosine phosphatase, receptor type, M	NM_002845	5797	g4506318	73.69	41.01	755.46	236.06	10.25	3.89	122.72	681.77	2.845	0.023395
210340_s_at	CSF2RA: colony stimulating factor 2 receptor, alpha, low-affinity (granulocyte-macrophage)	BC002635	1438	g12803600	16.57	7.27	166.37	42.98	10.04	4.62	37.33	149.8	3.437	0.010006
1554242_a_at	COCH: cochlin	BC007230	1690	Hs2.21016.2	19.82	4.77	196.21	63.9	9.9	4.33	19.14	176.38	2.752	0.028097
210538_s_at	BIRC3: baculoviral IAP repeat containing 3	U37546	330	g1145290	139.61	68.5	1351.62	314.64	9.68	4.49	51.02	1212.01	3.764	0.005998
209160_at	AKR1C3: aldo-keto reductase family 1, member C3	AB018580	8644	g6624210	123.43	74.79	1191.01	369.62	9.65	3.57	2891.61	1067.58	2.831	0.023442
205229_s_at	COCH: cochlin	AA669336	1690	Hs.21016.0	45.34	30.36	416.85	121.99	9.19	3.4	100000000	371.52	2.955	0.018736
212992_at	AHNAK2: AHNAK nucleoprotein 2	AI935123	113146	Hs.57548.0	90.02	45.04	824.08	190.43	9.15	4.23	52.49	734.06	3.751	0.005948
243974_at	OTTHUMG00000184053 /// RP3-331H24.6: NULL /// NULL	AI192452		Hs.167793.0	42.46	26.12	384.12	117.86	9.05	3.36	100000000	341.66	2.83	0.023134
225841_at	HENMT1: HEN1 methyltransferase homolog 1 (Arabidopsis)	BE502436	113802	Hs.7962.0	50.64	23.63	457.91	143.42	9.04	3.62	40.38	407.28	2.802	0.025089
212094_at	PEG10: paternally expressed 10	AL582836	23089	Hs.137476.0	571.59	599.49	5146.95	1496.03	9	2.68	100000000	4575.35	2.839	0.019665
202509_s_at	TNFAIP2: tumor necrosis factor, alpha-induced protein 2	AI862445	7127	Hs.101382.0	26.09	16.18	233.97	71.73	8.97	3.32	100000000	207.88	2.827	0.023169
206295_at	IL18: interleukin 18 (interferon-gamma-inducing factor)	NM_001562	3606	g4504652	135.12	108.58	1205.67	328.22	8.92	3.15	100000000	1070.54	3.097	0.013929
225671_at	SPNS2: spinster homolog 2 (Drosophila)	AL568674	124976	Hs.22824.1	230.61	219.63	2051.89	696.2	8.9	2.54	100000000	1821.27	2.495	0.036322
1557222_at	Hs2.160602.1	AW243038		Hs2.160602.1	20.48	8.18	179.37	64.06	8.76	3.2	27.63	158.89	2.461	0.042389
228494_at	PPP1R9A: protein phosphatase 1, regulatory subunit 9A	AI888150	55607	Hs.21816.0	54.11	42.49	473.41	141.68	8.75	2.98	100000000	419.3	2.835	0.021549
221583_s_at	KCNMA1: potassium large conductance calcium-activated channel, subfamily M, alpha member 1	AI129381	3778	Hs.89463.0	26.01	8.65	224.25	69.18	8.62	3.78	20.83	198.24	2.843	0.024134
228933_at	NHS: Nance-Horan syndrome (congenital cataracts and dental anomalies)	BF111819	4810	Hs.21470.0	57.15	44.18	489.93	126.57	8.57	3.15	100000000	432.78	3.228	0.011126
213056_at	FRMD4B: FERM domain containing 4B	AU145019	23150	Hs.96427.0	30.6	14.02	260.05	71.03	8.5	3.75	35.58	229.45	3.169	0.014288
223633_s_at	g13477230	BC005081		g13477230	48.01	22.72	404.12	85.66	8.42	4.09	38.6	356.11	4.018	0.003923
222926_at	DCDC2: doublecortin domain containing 2	AB032980	51473	Hs.61345.0	13.84	3.95	116.12	35.82	8.39	3.78	17.74	102.28	2.838	0.024494
244780_at	SGPP2: sphingosine-1-phosphate phosphatase 2	AI800110	130367	Hs.192455.0	19.77	5.61	163.05	51.02	8.25	3.67	17.41	143.27	2.791	0.026227
1556425_a_at	LOC284219: uncharacterized LOC284219	BF509747	284219	Hs2.297432.1	38.3	21.61	314.99	96.55	8.22	3.15	115.53	276.69	2.797	0.024295
235771_at	Hs.122147.0	BF594722		Hs.122147.0	41.28	19.5	337.7	88.63	8.18	3.65	37.65	296.42	3.266	0.012141
235476_at	TRIM59: tripartite motif containing 59	AW182459	286827	Hs.125759.0	39.57	12.21	323.08	53.21	8.16	4.85	17.14	283.51	5.193	0.000934
204932_at	TNFRSF11B: tumor necrosis factor receptor superfamily, member 11b	BF433902	4982	Hs.81791.0	450.78	314.6	3650.47	1143.37	8.1	2.82	100000000	3199.69	2.698	0.02717
213988_s_at	SAT1: spermidine/spermine N1-acetyltransferase 1	BE971383	6303	Hs.28491.3	304.33	159.64	2459.13	719.36	8.08	3.27	59.98	2154.8	2.924	0.020083
221802_s_at	KIAA1598: KIAA1598	AU157109	57698	Hs.23740.1	91.52	70.56	724.43	157.6	7.92	3.09	100000000	632.91	3.665	0.004982
213150_at	HOXA10: homeobox A10	BF792917	3206	Hs.110637.0	179.07	155.97	1416.58	493.08	7.91	2.31	100000000	1237.51	2.393	0.042658
225664_at	COL12A1: collagen, type XII, alpha 1	AA788946	1303	Hs.16869.0	53.91	35.61	423.46	86.23	7.86	3.36	100000000	369.55	3.961	0.003311
238013_at	PLEKHA2: pleckstrin homology domain containing, family A (phosphoinositide binding specific) member 2	BF347859	59339	Hs.190785.0	126.18	49.56	990.18	311.27	7.85	3.27	23.67	864	2.741	0.027538
1559960_x_at	SYCE1L: synaptonemal complex central element protein 1-like	BC035731	100130958	Hs2.210392.1	102.38	60.2	797.18	268.35	7.79	2.73	238.3	694.79	2.526	0.036621
238022_at	CRNDE: colorectal neoplasia differentially expressed (non-protein coding)	AA954994	643911	Hs.237396.1	96.85	81.14	751.22	225.91	7.76	2.55	100000000	654.37	2.726	0.024368
226621_at	OSMR: oncostatin M receptor	AI133452	9180	Hs.75431.3	227.06	143.32	1755.59	354.18	7.73	3.38	100000000	1528.53	4.001	0.003163
207709_at	PRKAA2: protein kinase, AMP-activated, alpha 2 catalytic subunit	NM_006252	5563	g5453965	18.18	11.94	136.46	38.55	7.5	2.85	100000000	118.28	2.931	0.018402
219911_s_at	SLCO4A1: solute carrier organic anion transporter family, member 4A1	NM_016354	28231	g7706516	231.53	117.59	1730.55	621.21	7.47	2.57	46.92	1499.02	2.371	0.047255
202644_s_at	TNFAIP3: tumor necrosis factor, alpha-induced protein 3	NM_006290	7128	g5454131	161.03	82.19	1200.7	404.97	7.46	2.73	47.79	1039.67	2.516	0.037663
1564378_a_at	Hs2.306766.1	AK025101		Hs2.306766.1	63.15	24.05	463.37	161.47	7.34	2.78	21.37	400.22	2.452	0.042602
215073_s_at	NR2F2: nuclear receptor subfamily 2, group F, member 2	AL554245	7026	Hs.288869.1	122.11	66.14	892.18	319.3	7.31	2.47	68.39	770.07	2.362	0.047529
217996_at	PHLDA1: pleckstrin homology-like domain, family A, member 1	AA576961	22822	Hs.82101.0	512.62	336.72	3740.37	529.72	7.3	3.32	100000000	3227.76	5.142	0.000437
205476_at	CCL20: chemokine (C-C motif) ligand 20	NM_004591	6364	g4759075	45.93	26.44	332.75	96.15	7.25	2.86	136.98	286.82	2.876	0.020649
207850_at	CXCL3: chemokine (C-X-C motif) ligand 3	NM_002090	2921	g4504156	60.53	30.69	434.88	105.73	7.18	3.24	43.92	374.35	3.4	0.009194
210592_s_at	SAT1: spermidine/spermine N1-acetyltransferase 1	M55580	6303	g338335	977.82	608.72	6982.06	1507.73	7.14	3.09	100000000	6004.24	3.693	0.005058
204073_s_at	MYRF: myelin regulatory factor	NM_013279	745	g7019334	173.95	96.67	1232.47	388	7.09	2.68	83.54	1058.52	2.647	0.029951
209386_at	TM4SF1: transmembrane 4 L six family member 1	AI346835	4071	Hs.3337.0	1080.83	645.69	7622.32	1146.12	7.05	3.34	406.26	6541.49	4.973	0.000588
223058_at	FAM107B: family with sequence similarity 107, member B	AL136885	83641	g12053268	265.05	158.25	1855.35	353.85	7	3.18	390.53	1590.3	4.103	0.002533
203837_at	MAP3K5: mitogen-activated protein kinase kinase kinase 5	NM_005923	4217	g6031181	73.19	35.63	496.1	124.81	6.78	3.06	34.72	422.91	3.258	0.011436
203650_at	PROCR: protein C receptor, endothelial	NM_006404	10544	g5453645	243.46	89.39	1648.45	381.08	6.77	3.46	17.86	1404.99	3.589	0.007495
217983_s_at	RNASET2: ribonuclease T2	NM_003730	8635	g5231227	539.18	242.93	3619.83	1051.17	6.71	2.87	26.92	3080.65	2.855	0.022109
209387_s_at	TM4SF1: transmembrane 4 L six family member 1	M90657	4071	g186803	799.29	612.65	5323.15	974.4	6.66	2.7	100000000	4523.86	3.93	0.002826
227801_at	TRIM59: tripartite motif containing 59	N90779	286827	Hs.36830.0	155.06	100.71	1017.26	168.31	6.56	2.94	100000000	862.2	4.396	0.001364
233085_s_at	NABP1: nucleic acid binding protein 1	AV734843	64859	Hs.118183.1	161.65	97.62	1056.48	288.31	6.54	2.62	971.02	894.83	2.94	0.017664
226560_at	Hs.13234.0	AA576959		Hs.13234.0	43.53	25.13	280.63	77.2	6.45	2.62	128.95	237.11	2.92	0.018428
228415_at	AP1S2: adaptor-related protein complex 1, sigma 2 subunit	AA205444	8905	Hs.40368.2	233.65	139.3	1503.99	384.29	6.44	2.67	333.89	1270.34	3.108	0.013244
217984_at	RNASET2: ribonuclease T2	NM_003730	8635	g5231227	505.85	265.06	3230.15	965.96	6.39	2.55	47.12	2724.31	2.72	0.026294
220122_at	MCTP1: multiple C2 domains, transmembrane 1	NM_024717	79772	g13376020	36.77	10.44	233.37	55.49	6.35	3.4	12.84	196.6	3.482	0.009214
1555579_s_at	PTPRM: protein tyrosine phosphatase, receptor type, M	BC029442	5797	Hs2Affx.1.373	107.9	52.83	679.73	217.02	6.3	2.45	33.39	571.82	2.56	0.034366
206343_s_at	NRG1: neuregulin 1	NM_013959	3084	g7669517	121.33	76.1	760.33	264.36	6.27	2.09	100000000	639	2.323	0.048401
223079_s_at	GLS: glutaminase	AI828035	2744	Hs.239189.1	148.59	59.78	931.63	268.58	6.27	2.78	19.53	783.05	2.846	0.02258
202890_at	MAP7: microtubule-associated protein 7	AW242297	9053	Hs.146388.0	39.22	31.38	244.61	60.92	6.24	2.29	100000000	205.39	2.997	0.013966
218404_at	SNX10: sorting nexin 10	NM_013322	29887	g7019536	330.06	60.51	2046.33	659.93	6.2	2.8	10.84	1716.28	2.59	0.035443
218656_s_at	LHFP: lipoma HMGIC fusion partner	NM_005780	10186	g5031864	110.91	80.67	678.59	149.19	6.12	2.45	100000000	567.68	3.347	0.007665
211287_x_at	CSF2RA: colony stimulating factor 2 receptor, alpha, low-affinity (granulocyte-macrophage)	M64445	1438	g183361	32.91	7.91	201.16	55.49	6.11	3.08	11.41	168.25	3.002	0.01899
238441_at	PRKAA2: protein kinase, AMP-activated, alpha 2 catalytic subunit	AI928203	5563	Hs.86379.0	37.86	16.11	231.3	73.93	6.11	2.46	21.48	193.44	2.556	0.03511
227892_at	PRKAA2: protein kinase, AMP-activated, alpha 2 catalytic subunit	AA855042	5563	Hs.127301.0	85.91	56.32	521.9	167.4	6.08	2.13	100000000	436	2.469	0.037368
212298_at	NRP1: neuropilin 1	BE620457	8829	Hs.69285.2	89.15	42.56	541.49	171.18	6.07	2.4	29.3	452.34	2.564	0.034026
225639_at	SKAP2: src kinase associated phosphoprotein 2	N21390	8935	Hs.5888.0	243.01	169.32	1471.43	401	6.06	2.28	100000000	1228.43	2.822	0.019876
211653_x_at	AKR1C2 /// LOC101060798: aldo-keto reductase family 1, member C2 /// aldo-keto reductase family 1 member C2-like	M33376	1646 /// 101060798	g187444	128.76	59.72	779.11	222.08	6.05	2.59	26.36	650.35	2.828	0.022354
223218_s_at	NFKBIZ: nuclear factor of kappa light polypeptide gene enhancer in B-cells inhibitor, zeta	AB037925	64332	g13516830	403.96	159.76	2433.12	619.71	6.02	2.88	18	2029.16	3.171	0.013439
213816_s_at	MET: met proto-oncogene (hepatocyte growth factor receptor)	AA005141	4233	Hs.285754.1	109.54	61.88	658.4	206.56	6.01	2.26	85.79	548.86	2.545	0.03389
221584_s_at	KCNMA1: potassium large conductance calcium-activated channel, subfamily M, alpha member 1	U11058	3778	g7914977	151.54	98.88	906.87	254.8	5.98	2.29	100000000	755.33	2.764	0.022437
225239_at	MIR612 /// NEAT1: microRNA 612 /// nuclear paraspeckle assembly transcript 1 (non-protein coding)	AI355441	283131 /// 693197	Hs.285814.2	535.03	145.79	3198.62	943.17	5.98	2.82	12.15	2663.59	2.791	0.025654
222872_x_at	NABP1: nucleic acid binding protein 1	AU157541	64859	Hs.118183.0	233.32	145.41	1389.64	404.33	5.96	2.27	100000000	1156.32	2.691	0.025766
232994_s_at	ARHGEF28: Rho guanine nucleotide exchange factor (GEF) 28	BE884959	64283	Hs.33254.1	124.91	93.05	742.11	204.29	5.94	2.16	100000000	617.2	2.749	0.0219
235331_x_at	PCGF5: polycomb group ring finger 5	AI341142	84333	Hs.197484.0	23.77	16.17	138.95	33.82	5.85	2.34	100000000	115.19	3.073	0.012619
227510_x_at	MALAT1: metastasis associated lung adenocarcinoma transcript 1 (non-protein coding)	AL037917	378938	Hs.279789.7	332.7	245.42	1933.8	458.38	5.81	2.26	100000000	1601.1	3.079	0.012029
232925_at	Hs.287577.0	AU156822		Hs.287577.0	37.47	7.96	217.11	62.99	5.79	2.85	10.34	179.63	2.829	0.024614
201798_s_at	MYOF: myoferlin	NM_013451	26509	g7305052	1237.09	847.47	7138.42	1193.56	5.77	2.52	100000000	5901.33	4.031	0.002423
211864_s_at	MYOF: myoferlin	AF207990	26509	g10834586	686.03	435.81	3936.49	899.16	5.74	2.42	100000000	3250.46	3.253	0.009324
213358_at	SOGA2: SOGA family member 2	AB018345	23255	Hs.27657.0	252.76	124.64	1446.05	304.44	5.72	2.74	30.7	1193.29	3.627	0.005553
230788_at	GCNT2: glucosaminyl (N-acetyl) transferase 2, I-branching enzyme (I blood group)	BF059748	2651	Hs.116346.0	231.03	106.31	1312.32	309.5	5.68	2.68	23.92	1081.29	3.304	0.00996
215206_at	Hs.288700.0	AK025143		Hs.288700.0	62.61	17.52	352.47	115.3	5.63	2.4	11.88	289.86	2.486	0.04044
223217_s_at	NFKBIZ: nuclear factor of kappa light polypeptide gene enhancer in B-cells inhibitor, zeta	BE646573	64332	Hs.301183.0	296.77	123.43	1667.76	499.4	5.62	2.4	18.73	1370.99	2.665	0.029182
237310_at	Hs.131793.0	AI743607		Hs.131793.0	49.84	20.93	278.25	83.27	5.58	2.38	18.98	228.41	2.66	0.029318
211676_s_at	IFNGR1: interferon gamma receptor 1	AF056979	3459	g13562048	106.26	20.61	586.56	159.04	5.52	2.89	9.4	480.3	2.995	0.019328
230499_at	BIRC3: baculoviral IAP repeat containing 3	AA805622	330	Hs.121572.0	41.93	20.73	230.11	72.68	5.49	2.15	30.28	188.19	2.49	0.037304
244753_at	Hs.243189.0	BF000430		Hs.243189.0	84.76	20.36	460.16	125	5.43	2.77	10.1	375.4	2.964	0.019795
228642_at	HOTAIRM1: HOXA transcript antisense RNA, myeloid-specific 1	BF593636	100506311	Hs.101064.1	136.3	89.9	739.01	209.42	5.42	2.05	100000000	602.71	2.645	0.026479
223059_s_at	FAM107B: family with sequence similarity 107, member B	BC004872	83641	g13436100	257.15	118	1386.73	304.41	5.39	2.62	22.45	1129.59	3.46	0.007411
233073_at	Hs.14480.1	AU157438		Hs.14480.1	25.07	8.57	135.16	44.68	5.39	2.21	13.56	110.09	2.42	0.043817
237465_at	USP53: ubiquitin specific peptidase 53	BF196943	54532	Hs.135457.0	32.01	6.05	170.93	46.95	5.34	2.78	9.05	138.92	2.935	0.021099
232098_at	DST: dystonin	AK025142	667	Hs.287669.0	52	18.4	275.91	68.7	5.31	2.64	13.4	223.91	3.148	0.013758
211668_s_at	PLAU: plasminogen activator, urokinase	K03226	5328	g340155	724.05	304.75	3778.58	691.38	5.22	2.75	17.29	3054.52	4.043	0.002803
225344_at	NCOA7: nuclear receptor coactivator 7	AL035689	135112	Hs.6966.0	255.43	102.41	1321.56	386.59	5.17	2.27	16.04	1066.13	2.666	0.028781
1556211_a_at	Hs2.48645.1	N62827		Hs2.48645.1	65.95	25.13	338.76	50.17	5.14	2.92	14	272.8	4.862	0.000753
213222_at	PLCB1: phospholipase C, beta 1 (phosphoinositide-specific)	AL049593	23236	Hs.41143.0	26.03	4.26	133.26	42.12	5.12	2.38	8.66	107.23	2.533	0.038447
202820_at	AHR: aryl hydrocarbon receptor	NM_001621	196	g5016091	81.31	38.75	415.17	112.19	5.11	2.24	24.27	333.86	2.813	0.02146
240176_at	Hs.61753.0	AI078180		Hs.61753.0	33.46	15.16	168.65	48.07	5.04	2.17	20.49	135.19	2.682	0.027034
244725_at	DMRTA1: DMRT-like family A1	AI017682	63951	Hs.266747.0	32.1	12.33	161.35	40.75	5.03	2.43	14.31	129.26	3.036	0.015739
222483_at	EFHD2: EF-hand domain family, member D2	AW664179	79180	Hs.301342.0	185.71	83.14	930.67	240.36	5.01	2.29	19.6	744.96	2.929	0.017844
202637_s_at	ICAM1: intercellular adhesion molecule 1	AI608725	3383	Hs.168383.0	121.79	44.52	608.72	137.38	5	2.58	13.08	486.92	3.372	0.009197
232174_at	Hs.188536.0	AA480392		Hs.188536.0	92.05	32.06	460.45	144.2	5	2.15	12.74	368.4	2.494	0.038529
242814_at	SERPINB9: serpin peptidase inhibitor, clade B (ovalbumin), member 9	AI986192	5272	Hs.187603.0	33.17	8.26	164.49	43.37	4.96	2.57	9.35	131.32	2.974	0.019113
229194_at	PCGF5: polycomb group ring finger 5	AL045882	84333	Hs.126695.0	182.91	115.28	899.47	148.35	4.92	2.24	100000000	716.56	3.814	0.003581
231963_at	ANKRD33B: ankyrin repeat domain 33B	BG111938	651746	Hs.26039.0	112.36	37.92	550.28	141.99	4.9	2.42	11.74	437.92	2.98	0.017761
200621_at	CSRP1: cysteine and glycine-rich protein 1	NM_004078	1465	g4758085	605.83	338.69	2945.49	538.25	4.86	2.29	60.67	2339.65	3.679	0.004262
220483_s_at	RNF19A: ring finger protein 19A, E3 ubiquitin protein ligase	NM_015435	25897	g13491169	106.44	33.85	513.28	151.28	4.82	2.21	11.06	406.84	2.624	0.031545
239629_at	Hs.157313.0	AI634046		Hs.157313.0	51.69	17.46	248.17	72.16	4.8	2.2	11.69	196.48	2.647	0.030124
203299_s_at	AP1S2: adaptor-related protein complex 1, sigma 2 subunit	AF251295	8905	g12005731	117.87	82.49	563.67	110.59	4.78	2.01	100000000	445.8	3.231	0.009181
239251_at	Hs.269339.0	AW963634		Hs.269339.0	78.36	22.77	374.37	84.41	4.78	2.61	9.77	296.01	3.386	0.009636
205931_s_at	CREB5 /// LOC401317: cAMP responsive element binding protein 5 /// uncharacterized LOC401317	NM_004904	9586 /// 401317	g4758499	27.17	7.92	129.5	37.06	4.77	2.27	10.1	102.33	2.7	0.028319
210512_s_at	VEGFA: vascular endothelial growth factor A	AF022375	7422	g3719220	755.19	250.39	3578.77	609.18	4.74	2.74	10.75	2823.58	4.287	0.002046
244503_at	Hs.224793.0	BF674612		Hs.224793.0	34.12	16.81	158.14	36.8	4.63	2.15	24.86	124.01	3.065	0.012987
203946_s_at	ARG2: arginase 2	U75667	384	g1763757	79.81	22.91	367.99	77.39	4.61	2.6	9.27	288.18	3.57	0.007093
211020_at	GCNT2: glucosaminyl (N-acetyl) transferase 2, I-branching enzyme (I blood group)	L19659	2651	g307297	40.18	9.98	185.29	35.76	4.61	2.76	8.31	145.11	3.909	0.004466
201876_at	PON2: paraoxonase 2	NM_000305	5445	g4505952	1189.5	405.16	5463.86	874.78	4.59	2.67	10.72	4274.36	4.434	0.001502
206237_s_at	NRG1: neuregulin 1	NM_013957	3084	g7669513	50.74	13.32	231.61	64.25	4.56	2.26	8.96	180.87	2.756	0.02612
225575_at	LIFR: leukemia inhibitory factor receptor alpha	AI680541	3977	Hs.23767.2	55.33	22.45	251.29	51.61	4.54	2.35	14.03	195.96	3.482	0.006762
207085_x_at	CSF2RA: colony stimulating factor 2 receptor, alpha, low-affinity (granulocyte-macrophage)	NM_006140	1438	g5453626	53.43	14.38	241.83	64.63	4.53	2.29	8.96	188.4	2.846	0.02259
215726_s_at	CYB5A: cytochrome b5 type A (microsomal)	M22976	1528	Hs.83834.2	225.62	101.93	1017.39	181.26	4.51	2.33	17.81	791.77	3.808	0.003549
214307_at	HGD: homogentisate 1,2-dioxygenase	AI478172	3081	Hs.15113.1	29.65	7.5	132.29	41.56	4.46	2.01	8.78	102.64	2.431	0.043353
205729_at	OSMR: oncostatin M receptor	NM_003999	9180	g4557039	65.23	32.36	287.71	67.29	4.41	2.04	24.35	222.48	2.98	0.014694
209201_x_at	CXCR4: chemokine (C-X-C motif) receptor 4	L01639	7852	g189313	53.54	18.22	235.58	63.2	4.4	2.12	10.69	182.05	2.768	0.024152
215268_at	KIAA0754: KIAA0754	AW663712	643314	Hs.159183.0	29.54	9.21	129.71	30.57	4.39	2.32	9.59	100.16	3.137	0.013497
236725_at	WWC1: WW and C2 domain containing 1	H09245	23286	Hs.313078.0	74.66	17.72	325.12	74.07	4.35	2.46	7.82	250.46	3.289	0.011514
229399_at	C10orf118: chromosome 10 open reading frame 118	BF438440	55088	Hs.195704.0	62.04	23.13	268.83	65.32	4.33	2.15	11.73	206.8	2.984	0.016232
203072_at	MYO1E: myosin IE	NM_004998	4643	g4826843	155.47	56.04	670.35	171.48	4.31	2.11	11.19	514.87	2.854	0.02043
233271_at	Hs.295633.0	AU145563		Hs.295633.0	64.33	19.24	271.41	71.83	4.22	2.11	9.02	207.07	2.785	0.023917
238025_at	MLKL: mixed lineage kinase domain-like	AA706818	197259	Hs.119878.0	88.59	32.93	374.1	53.78	4.22	2.43	11.06	285.5	4.527	0.001106
221808_at	RAB9A: RAB9A, member RAS oncogene family	NM_004251	9367	Hs.28726.0	750.66	215.76	3116.04	797.58	4.15	2.13	8.56	2365.38	2.863	0.021163
242133_s_at	Hs.137158.0	AA630955		Hs.137158.0	54.05	14.65	221.86	54.29	4.1	2.19	8.06	167.81	2.984	0.017592
201811_x_at	SH3BP5: SH3-domain binding protein 5 (BTK-associated)	NM_004844	9467	g4759057	200.09	71.01	816.22	157.51	4.08	2.24	10.14	616.13	3.566	0.005808
224707_at	CYSTM1: cysteine-rich transmembrane module containing 1	AL522667	84418	Hs.323512.0	1070.98	198.05	4355.19	560.88	4.07	2.85	6.12	3284.21	5.521	0.000444
242594_at	BOD1L1: biorientation of chromosomes in cell division 1-like 1	AI889584	259282	Hs.213698.0	39.3	12.61	159.33	35.27	4.05	2.18	9.06	120.03	3.204	0.011442
202134_s_at	WWTR1: WW domain containing transcription regulator 1	NM_015472	25937	g13346497	174.43	24.18	701.95	160.36	4.02	2.41	6.07	527.51	3.253	0.013179
210513_s_at	VEGFA: vascular endothelial growth factor A	AF091352	7422	g5901560	98.21	34.67	394.7	83.41	4.02	2.15	9.98	296.48	3.282	0.009496
210260_s_at	TNFAIP8: tumor necrosis factor, alpha-induced protein 8	BC005352	25816	g13529163	287.08	109.83	1151.34	253.29	4.01	2.06	11.22	864.25	3.13	0.01191
243683_at	MORF4L2: mortality factor 4 like 2	H43976	9643	Hs.192905.0	74.59	33.12	298.02	48.19	4	2.12	15.01	223.42	3.821	0.003382
220329_s_at	RMND1: required for meiotic nuclear division 1 homolog (S. cerevisiae)	NM_017909	55005	g8923583	162.93	38.75	639.94	89.95	3.93	2.57	6.7	477	4.87	0.000854
213392_at	IQCK: IQ motif containing K	AW070229	124152	Hs.242407.2	147.63	32.21	575.29	141.45	3.9	2.14	6.8	427.66	2.948	0.019289
1560348_at	ARHGEF28: Rho guanine nucleotide exchange factor (GEF) 28	AK094713	64283	Hs2.375089.2	51.08	12.93	199.4	31.12	3.9	2.47	6.98	148.32	4.402	0.001717
201487_at	CTSC: cathepsin C	NM_001814	1075	g4503140	1395.61	449.48	5398.46	594.85	3.87	2.41	8.34	4002.86	5.369	0.000336
229694_at	WDR11: WD repeat domain 11	BF062828	55717	Hs.16677.1	67.09	20.99	258.18	51.62	3.85	2.16	8.31	191.09	3.429	0.0076
208961_s_at	KLF6: Kruppel-like factor 6	AB017493	1316	g3582142	510.96	236.61	1942.37	254.03	3.8	2.04	16.07	1431.4	4.123	0.002675
212223_at	IDS: iduronate 2-sulfatase	AI926544	3423	Hs.303154.1	284.72	85.05	1072.85	228.03	3.77	2.1	7.84	788.13	3.238	0.010664
36711_at	MAFF: v-maf musculoaponeurotic fibrosarcoma oncogene homolog F (avian)	AL021977	23764	4848734_RC	509.36	132.05	1901.2	246.24	3.73	2.43	6.7	1391.84	4.981	0.0006
225320_at	MCU: mitochondrial calcium uniporter	AA579630	90550	Hs.4896.0	385.69	141.96	1438.7	271.74	3.73	2.04	9.74	1053.01	3.435	0.006715
240399_at	Hs.194600.0	AA668261		Hs.194600.0	40.92	8.44	152.15	32.06	3.72	2.23	6.18	111.24	3.355	0.010162
225662_at	ZAK: sterile alpha motif and leucine zipper containing kinase AZK	H28667	51776	Hs.16930.0	640.03	71.39	2371.18	437.35	3.7	2.49	5.18	1731.15	3.907	0.005292
218826_at	SLC35F2: solute carrier family 35, member F2	NM_017515	54733	g13435132	564.68	163.26	2086.07	430.81	3.69	2.09	7.46	1521.39	3.302	0.009581
231817_at	USP53: ubiquitin specific peptidase 53	H25097	54532	Hs.101799.1	64.12	12.7	236.46	35.29	3.69	2.48	5.78	172.34	4.594	0.001467
243031_at	Hs.163615.0	N90377		Hs.163615.0	45.99	10.06	169	31.03	3.68	2.29	6.15	123.01	3.771	0.005068
204863_s_at	IL6ST: interleukin 6 signal transducer (gp130, oncostatin M receptor)	BE856546	3572	Hs.82065.0	377.97	88.65	1383.5	315.21	3.66	2.07	6.53	1005.53	3.071	0.015249
229310_at	KLHL29: kelch-like family member 29	BE465475	114818	Hs.272572.1	61.04	21.13	223.18	38.72	3.66	2.08	8.74	162.13	3.676	0.004447
229883_at	GRIN2D: glutamate receptor, ionotropic, N-methyl D-aspartate 2D	AI524330	2906	Hs.99389.0	60.3	16.13	219.38	47.51	3.64	2.06	6.97	159.08	3.171	0.012296
203234_at	UPP1: uridine phosphorylase 1	NM_003364	7378	g4507838	373.96	159.48	1356.34	172.7	3.63	2.02	12.26	982.38	4.179	0.002432
209636_at	NFKB2: nuclear factor of kappa light polypeptide gene enhancer in B-cells 2 (p49/p100)	BC002844	4791	g12803988	60.32	15.52	218.11	50.21	3.62	2.01	6.8	157.79	3.002	0.016481
232138_at	MBNL2: muscleblind-like splicing regulator 2	AW276914	10150	Hs.326714.0	68.1	13.33	244.87	56.86	3.6	2.07	5.95	176.77	3.027	0.017048
1566342_at	SOD2: superoxide dismutase 2, mitochondrial	R34841	6648	Hs2.384944.1	130.37	18.92	458.66	98.61	3.52	2.17	5.29	328.29	3.27	0.012418
205190_at	PLS1: plastin 1	NM_002670	5357	g4505896	322.39	91.82	1125.96	153.54	3.49	2.2	6.75	803.57	4.492	0.001176
225665_at	ZAK: sterile alpha motif and leucine zipper containing kinase AZK	AI129320	51776	Hs.16930.0	573.03	128.75	1966.97	312.38	3.43	2.22	5.73	1393.94	4.126	0.002591
239973_at	Hs.212709.0	AW450675		Hs.212709.0	65.13	12.87	223.03	46.89	3.42	2.06	5.59	157.9	3.248	0.011766
201502_s_at	NFKBIA: nuclear factor of kappa light polypeptide gene enhancer in B-cells inhibitor, alpha	AI078167	4792	Hs.81328.0	1121.06	322.01	3820.7	503.28	3.41	2.15	6.62	2699.64	4.518	0.001112
205193_at	MAFF: v-maf musculoaponeurotic fibrosarcoma oncogene homolog F (avian)	NM_012323	23764	g6912489	326.26	71.35	1103.58	143.31	3.38	2.29	5.48	777.32	4.856	0.000764
227701_at	C10orf118: chromosome 10 open reading frame 118	AK024739	55088	Hs.28538.0	136.86	38.59	458.62	54.96	3.35	2.15	6.39	321.76	4.791	0.000742
212989_at	SGMS1: sphingomyelin synthase 1	AI377497	259230	Hs.153716.0	136.49	23.97	451.17	61.09	3.31	2.31	4.9	314.69	4.795	0.001033
202148_s_at	PYCR1: pyrroline-5-carboxylate reductase 1	NM_006907	5831	g5902035	257.35	90.61	848.79	90.02	3.3	2	7.92	591.44	4.631	0.001504
227699_at	L3HYPDH: L-3-hydroxyproline dehydratase (trans-)	BF511003	112849	Hs.29706.0	157.41	26.12	520.2	92.88	3.3	2.17	4.97	362.79	3.76	0.005501
236027_at	SFR1: SWI5-dependent recombination repair 1	N23587	119392	Hs.93667.0	345.8	53.79	1138.25	238.49	3.29	2.04	5	792.45	3.241	0.012518
203200_s_at	MTRR: 5-methyltetrahydrofolate-homocysteine methyltransferase reductase	NM_024010	4552	g13325067	489.68	117.65	1581.26	225.73	3.23	2.1	5.55	1091.57	4.288	0.001723
236953_s_at	NHLRC3: NHL repeat containing 3	N25548	387921	Hs.250614.0	58.68	10.38	188.85	34.68	3.22	2.07	4.96	130.16	3.596	0.006801
235103_at	MAN2A1: mannosidase, alpha, class 2A, member 1	AA029155	4124	Hs.204295.0	155.09	41.15	498.43	51.1	3.21	2.14	5.8	343.34	5.233	0.000437
1555201_a_at	RMND1: required for meiotic nuclear division 1 homolog (S. cerevisiae)	BC012081	55005	Hs2.238270.2	153.24	38.26	490.92	54.77	3.2	2.14	5.56	337.68	5.054	0.000502
225062_at	LOC389831: uncharacterized LOC389831	BF667120	389831	Hs.90424.1	359.3	73.74	1123.88	119.66	3.13	2.2	4.86	764.57	5.44	0.000288
200742_s_at	TPP1: tripeptidyl peptidase I	BG231932	1200	Hs.20478.0	235.47	47.17	700.23	100.15	2.97	2.01	4.66	464.76	4.198	0.002114
226765_at	SPTBN1: spectrin, beta, non-erythrocytic 1	AA971514	6711	Hs.324648.1	136.57	23.12	389.81	51.93	2.85	2.01	4.17	253.24	4.455	0.001502
